# Supplementary material
Source: PubMed Central journal article supplement (PMC3193479)
Supplement: cr201179x2.pdf [file cr201179x2.pdf]

## Supplementary information, Figure S2

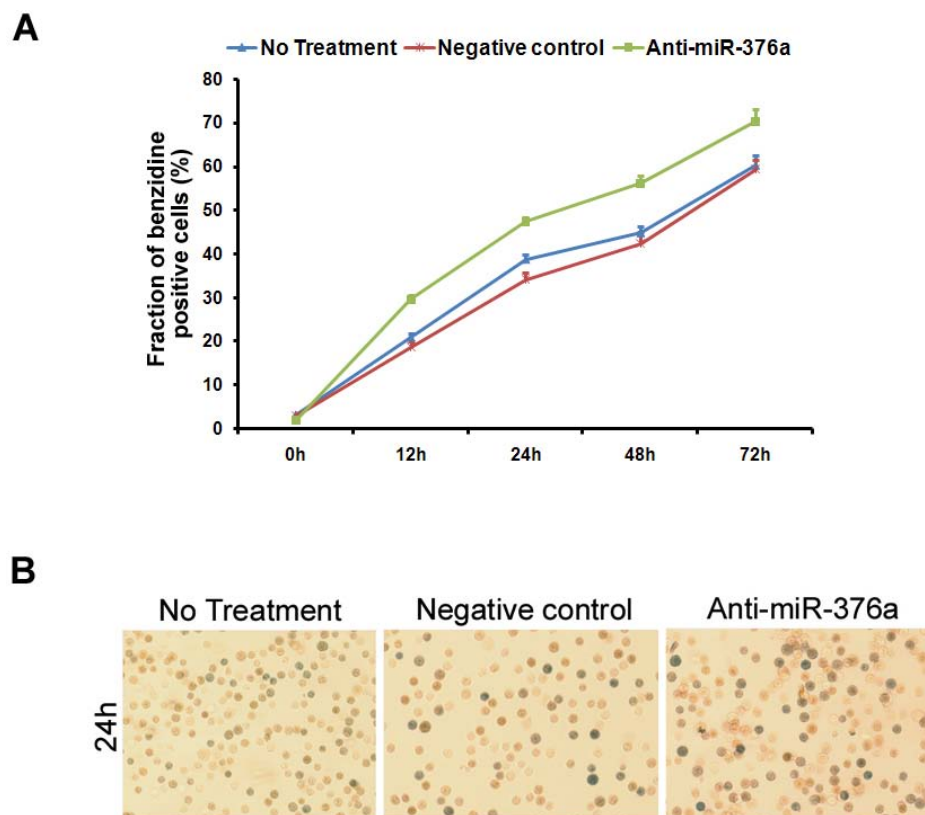

**Figure S2** Inhibition of miR-376a promotes erythroid differentiation of K562 cells. **(A)** Benzidine staining of K562 cells that were untransfected, transfected with a negative control, or a miR-376a inhibitor (Anti-miR-376a) and exposed to hemin induction for 12, 24, 48, and 72 h. Error bars represent the standard deviation and were obtained from three independent experiments. **(B)** Representative benzidine staining of the un-transfected and transfected K562 cells after 24 h of hemin induction.
