# Supplementary material
Source: PubMed Central journal article supplement (PMC3193479)
Supplement: cr201179x3.pdf [file cr201179x3.pdf]

### Supplementary information, Figure S3

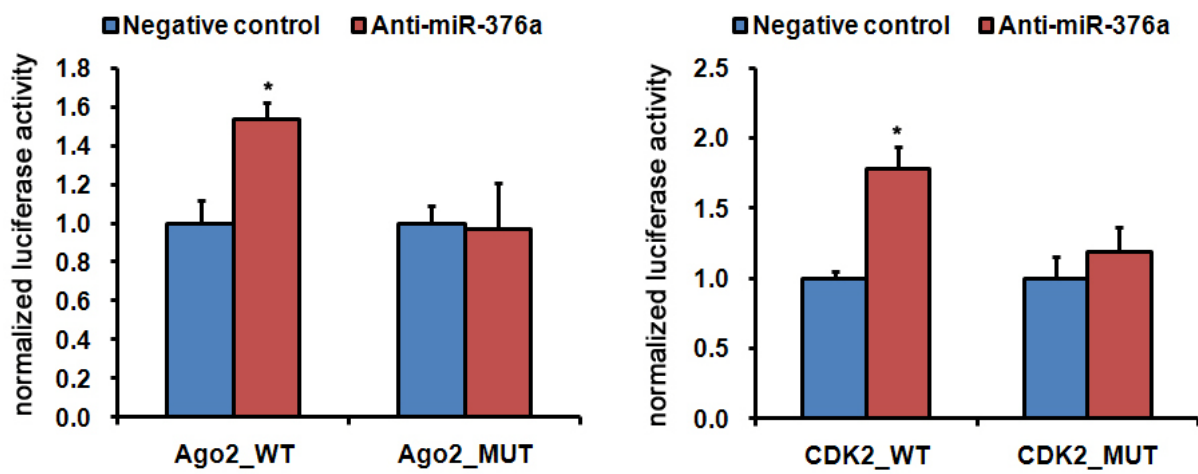

**Figure S3** Luciferase reporter analysis of Ago2\_WT and CDK2\_WT in K562 cells. Anti-miR-376a increased the luciferase activity of these two constructs as compared with the negative control. \*P<0.05.
