# Supplementary material
Source: PubMed Central journal article supplement (PMC3193479)
Supplement: cr201179x4.pdf [file cr201179x4.pdf]

## Supplementary information, Figure S4

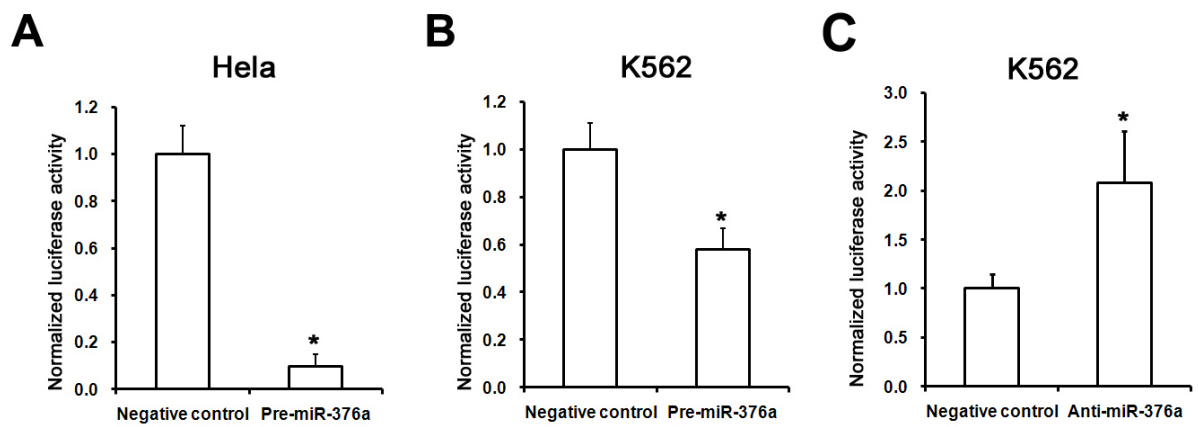

**Figure S4** Luciferase reporter analysis after co-transfection of pre-miR-376a, Anti-miR-376a, and pRL-TK\_376a (a positive control containing the sequence complementary to miR-376a) into HeLa and K562 cells. Results showed that pre-miR-376a inhibits the luciferase activity of pRL-TK\_376a in HeLa (A) and K562 (B) cells, whereas Anti-miR-376a accelerates the luciferase activity of pRL-TK\_376a (C), which indicates that pre-miR-376a functions in HeLa cells and K562 cells. Error bars are derived from three experiments in triplicate.
