# Supplementary material
Source: PubMed Central journal article supplement (PMC3193479)
Supplement: cr201179x6.pdf [file cr201179x6.pdf]

Supplementary information, Figure S6

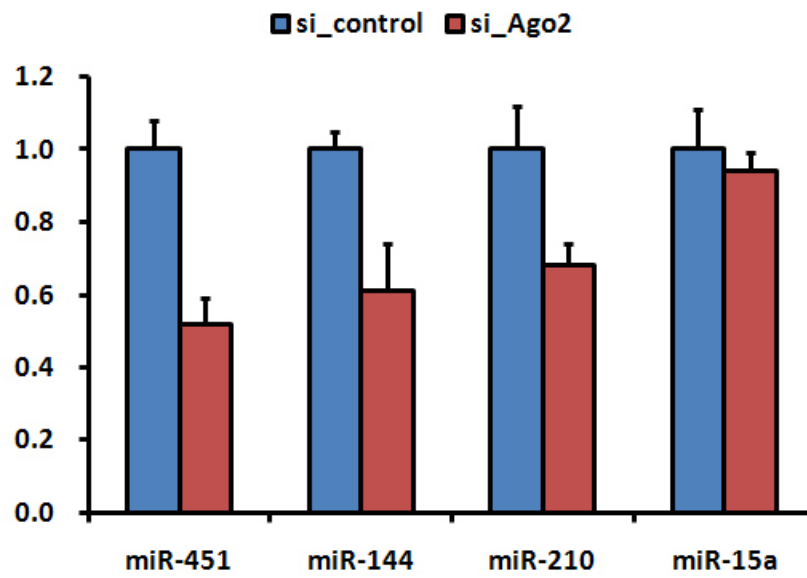

**Figure S6** Quantitative real-time PCR analysis of miR-451, 144, 210, and 15a expression in K562 cells treated with si\_Ago2 and a negative control.
