# Supplementary material
Source: PubMed Central journal article supplement (PMC3193479)
Supplement: cr201179x7.pdf [file cr201179x7.pdf]

Supplementary information, Figure S7

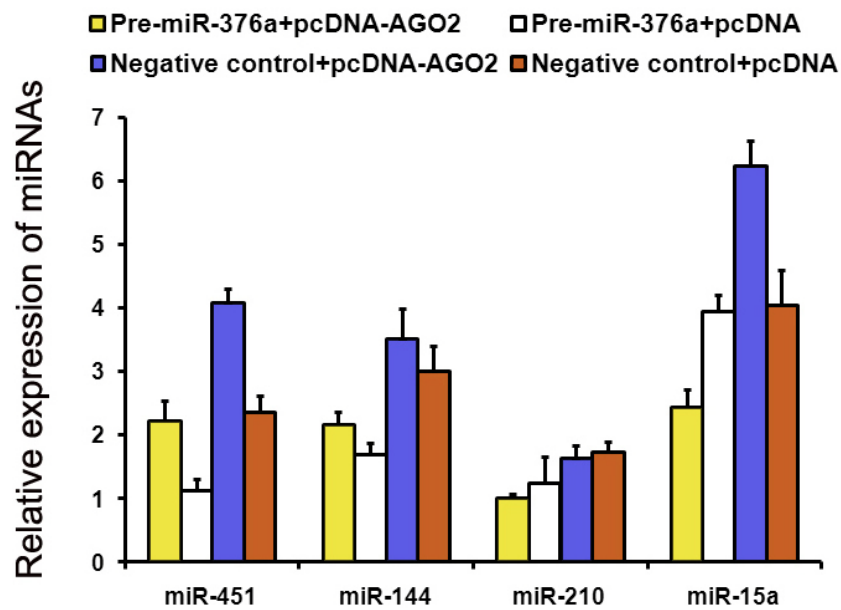

**Figure S7** Quantitative real-time PCR analysis of miR-451, 144, 210, and 15a expression in K562 cells that were first transfected with pre-miR-376a or a negative control for 24 h, then exposed to co-treatment with different combinations of pcDNA-Ago2 or pcDNA-empty, and pre-miR-376a or negative control precursor for another 24 h, followed by hemin induction for 24 h.
