# Supplementary material
Source: PubMed Central journal article supplement (PMC3193479)
Supplement: cr201179x8.pdf [file cr201179x8.pdf]

## Supplementary information, Figure S8

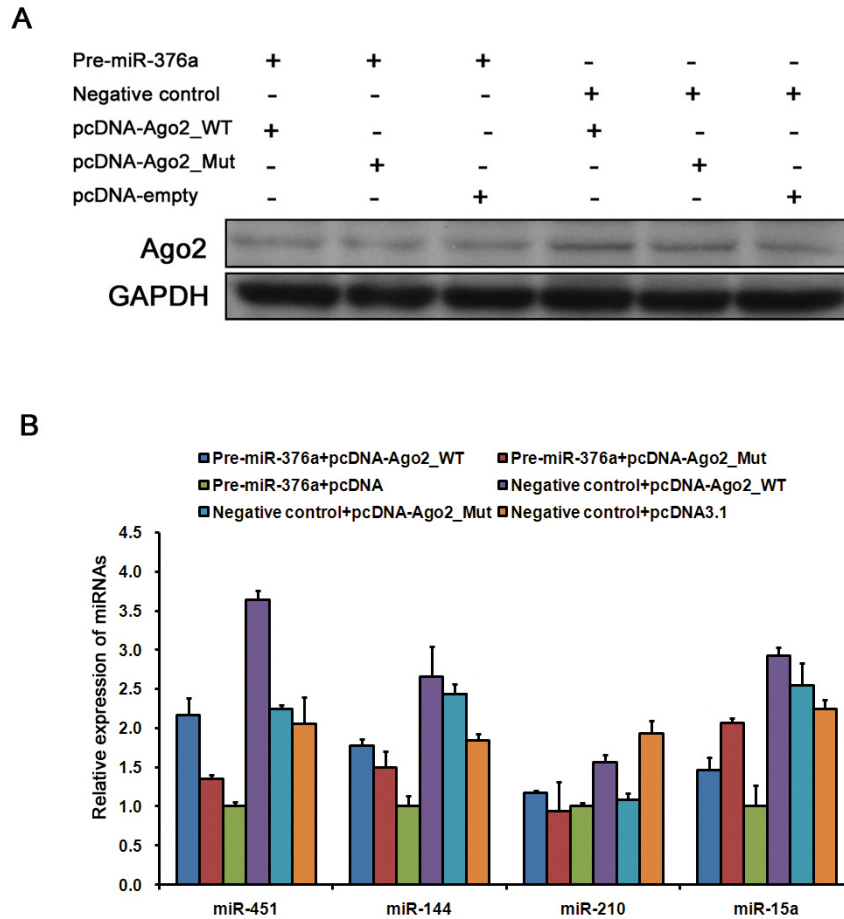

**Figure S8** Requirement of Ago2 catalytic activity for microRNA expression. **(A)** Immunoblotting of Ago2 and GAPDH in extracts from K562 cells that were transfected with pre-miR-376a or the negative control for 24 h and then subsequently treated for another 48 h with different combinations of pcDNA-Ago2\_WT, pcDNA-Ago2\_Mut or pcDNA, and pre-miR-376a or negative control precursor. **(B)** Quantitative real-time PCR analysis of miR-451, 144, 210, and 15a expression in K562 cells.
