# Supplementary material
Source: PubMed Central journal article supplement (PMC3193479)
Supplement: cr201179x10.pdf [file cr201179x10.pdf]

Supplementary information, Figure S10

**Lenti-vector**

**Lenti-miR-376a**

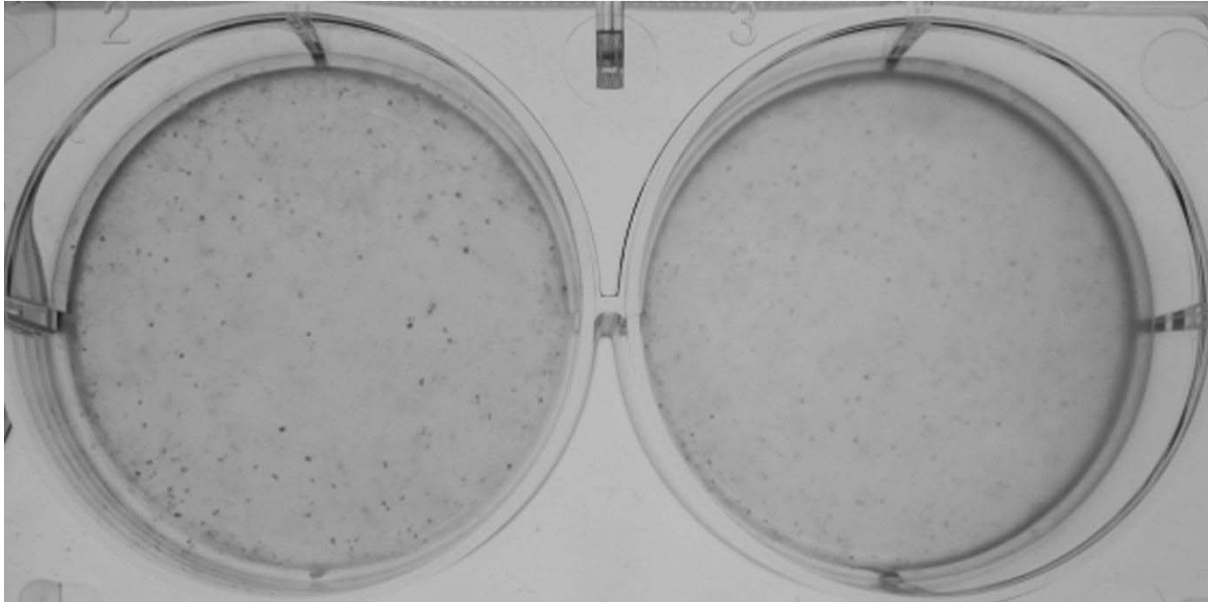

**Figure S10** Representative erythroid-colony forming assays of CD34+ HPCs at day 15 in semisolid media (BFU-E). A significant decrease in the number of BFU-E clones was observed in the cells infected with lenti-miR-376a as compared with the cells infected with lenti-vector.
