# Supplementary material
Source: PubMed Central journal article supplement (PMC3193479)
Supplement: cr201179x11.pdf [file cr201179x11.pdf]

## Supplementary information, Table S1

**Table S1** Sequences of primers and probes used in this study.

| <b>Primer name</b>                     | <b>Sequence</b>                                              |
|----------------------------------------|--------------------------------------------------------------|
| <b><i>RT primers:</i></b>              |                                                              |
| miR-376a                               | 5'-GTCGTATCCAGTGCAGGGTCCGAGGTATTCGCACTGGAT<br>ACGACACGTGG-3' |
| U6                                     | 5'-AAAATATGGAACGCTTCACGAATTTG-3'                             |
| <b><i>qRT-PCR primers:</i></b>         |                                                              |
| Ago2 up                                | 5'-CAGGAAGAATCTATACACAGCCATGC-3'                             |
| Ago2 down                              | 5'-CACTTGATGGACACCTTGAAGATGC-3'                              |
| CDK2 up                                | 5'-CAA GCTAGCAGACTTTGGACTAGC-3'                              |
| CDK2 down                              | 5'-CACAGCTGTGGAATAATATT TGCAGC-3'                            |
| miR-376a up                            | 5'-TCGGCGATCATAGAGGAAAATCC-3'                                |
| miR-376a down                          | 5'-GTGCAGGGTCCGAGGT-3'                                       |
| <b><i>Primers for 3' UTR:</i></b>      |                                                              |
| Ago2 up                                | 5'-TCTAGACTTTGCTTGACATGTTTTAGTGTTTAG-3'                      |
| Ago2 down                              | 5'-CTGCAAACCAGATATATATATTTTTCTCTTACAT-3'                     |
| CDK2 up                                | 5'-TCTAGATCCAATCAGTTTATAACCCTAG-3'                           |
| CDK2 down                              | 5'-ATGAGCTACAAACT AAATTACAAATAACG-3'                         |
| <b><i>Primers for full length:</i></b> |                                                              |
| Ago2 up                                | 5'- AAGCTTCCACCATGTACTCGGGAGCC-3'                            |
| Ago2 down                              | 5'- TCTAGAGCACTTGTCTGCCAACCTCTC-3'                           |
| CDK2 up                                | 5'- AAGCTTCGCTTCATGGAGAACTTCCAAAAGG -3'                      |
| CDK2 down                              | 5'- TCTAGAATAGCAAGAGCACTCAAGGACAAGG -3'                      |
| <b><i>Probes:</i></b>                  |                                                              |
| miR-376a                               | 5'-ACGTGGATTTTCTCTATGAT-3'                                   |
| U6 snRNA                               | 5'-CCATGCTAATCTTCTCTGTATCGTTCCAA-3'                          |
