# Supplementary material
Source: PubMed Central journal article supplement (PMC3193479)
Supplement: cr201179x13.pdf [file cr201179x13.pdf]

## Supplementary information, Table S3

**Table S3** Average values from the cell cycle analysis of K562 cells in CDK2 rescue assay.

| <i>Samples</i>                            | <b>0h</b>             | <b>3h</b>             | <b>6h</b>             | <b>12h</b>            | <b>24h</b>            |
|-------------------------------------------|-----------------------|-----------------------|-----------------------|-----------------------|-----------------------|
| <i>Pre-miR-376a +<br/>pcDNA-CDK2</i>      | G1: 40.0%<br>S: 45.3% | G1: 44.1%<br>S: 49.1% | G1: 38.1%<br>S: 50.5% | G1: 43.3%<br>S: 48.7% | G1: 47.5%<br>S: 37.5% |
| <i>Pre-miR-376a +<br/>pcDNA-empty</i>     | G1: 55.3%<br>S: 35.5% | G1: 56.8%<br>S: 37.6% | G1: 43.3%<br>S: 39.2% | G1: 55.6%<br>S: 35.8% | G1: 56.1%<br>S: 33.9% |
| <i>Negative control<br/>+ pcDNA-CDK2</i>  | G1: 38.4%<br>S: 47.8% | G1: 33.9%<br>S: 53.6% | G1: 36.5%<br>S: 55.2% | G1: 42.0%<br>S: 49.9% | G1: 46.0%<br>S: 40.2% |
| <i>Negative control<br/>+ pcDNA-empty</i> | G1: 44.2%<br>S: 42.7% | G1: 43.5%<br>S: 45.3% | G1: 39.6%<br>S: 48.9% | G1: 43.9%<br>S: 44.8% | G1: 50.3%<br>S: 38.2% |
